# Supplementary material for: Identification of Patients with Similar Gait Compensating Strategies Due to Unilateral Hip Osteoarthritis and the Effect of Total Hip Replacement: A Secondary Analysis
Source: MDPI journal article supplement (doi:10.3390/jcm10102167), 2021-05-17
Supplement: s1 [file s1]

**Table S1:** Preoperative and postoperative spatio-temporal, kinematic and kinetic outcome parameters and the p-values for the general linear model (GLM) of the clusters.

| Parameter                                | Pre         |              | Post        |             | GLM          |              |              |
|------------------------------------------|-------------|--------------|-------------|-------------|--------------|--------------|--------------|
|                                          | C1          | C2           | C1          | C2          | Group        | Time         | Int.         |
|                                          |             |              |             |             |              |              |              |
| <b>Spatiotemporal</b>                    |             |              |             |             |              |              |              |
| Walking speed (ms <sup>-1</sup> )        | 1.10 (0.15) | 1.03 (0.19)  | 1.21 (0.11) | 1.17 (0.17) | 0.214        | <b>0.000</b> | 0.468        |
| Step length (cm)                         | 62.0 (4.3)  | 58.8 (8.5)   | 65.5 (5.2)  | 63.6 (7.4)  | 0.173        | <b>0.000</b> | 0.385        |
| Cadence (steps per min)                  | 108.1 (9.6) | 106.3 (11.0) | 111.6 (8.1) | 110.6 (9.0) | 0.595        | <b>0.000</b> | 0.691        |
| Step width (cm)                          | 9.1 (2.6)   | 10.7 (3.1)   | 8.0 (2.6)   | 9.4 (2.9)   | <b>0.047</b> | <b>0.002</b> | 0.746        |
|                                          |             |              |             |             |              |              |              |
| <b>Kinematics (°)</b>                    |             |              |             |             |              |              |              |
| Hip extension                            | -9.7 (8.9)  | 8.7 (6.6)    | -14.5 (6.3) | -3.5 (7.9)  | <b>0.000</b> | <b>0.000</b> | <b>0.001</b> |
| Hip flexion                              | 22.6 (5.0)  | 34.3 (4.6)   | 27.6 (7.2)  | 34.0 (4.9)  | <b>0.000</b> | <b>0.010</b> | <b>0.004</b> |
| Hip RoM                                  | 32.3 (8.6)  | 25.6 (5.7)   | 42.1 (4.8)  | 37.5 (5.4)  | <b>0.001</b> | <b>0.000</b> | 0.240        |
| Knee extension                           | 6.0 (6.0)   | 13.1 (5.7)   | 4.0 (5.1)   | 8.3 (5.2)   | <b>0.000</b> | <b>0.000</b> | 0.104        |
| Knee flexion                             | 15.2 (4.2)  | 18.5 (6.1)   | 18.5 (4.8)  | 19.9 (5.0)  | 0.075        | <b>0.005</b> | 0.200        |
| Knee RoM                                 | 9.2 (5.2)   | 5.4 (3.3)    | 14.6 (4.6)  | 11.6 (5.0)  | <b>0.006</b> | <b>0.000</b> | 0.523        |
| Pelvic tilt                              | 6.1 (5.4)   | 18.5 (4.3)   | 5.4 (5.5)   | 12.4 (5.1)  | <b>0.000</b> | <b>0.000</b> | <b>0.000</b> |
| Pelvic obliquity up                      | 1.8 (2.0)   | 2.5 (2.4)    | 3.2 (2.5)   | 3.1 (1.8)   | 0.575        | <b>0.008</b> | 0.300        |
| mean FPA                                 | -9.4 (7.3)  | -10.0 (7.1)  | -8.8 (5.1)  | -9.1 (6.0)  | 0.786        | 0.372        | 0.887        |
| Thorax tilt                              | 10.2 (5.8)  | 8.2 (5.0)    | 8.2 (4.6)   | 6.3 (4.8)   | 0.165        | <b>0.000</b> | 0.941        |
| Thorax lean                              | -3.0 (2.4)  | -3.7 (2.7)   | -3.1 (2.4)  | -2.9 (2.8)  | 0.722        | 0.228        | 0.104        |
|                                          |             |              |             |             |              |              |              |
| <b>Joint moments (Nmkg<sup>-1</sup>)</b> |             |              |             |             |              |              |              |
| Knee adduction_1                         | 0.37 (0.13) | 0.39 (0.15)  | 0.38 (0.11) | 0.44 (0.17) | 0.246        | 0.112        | 0.283        |
| Knee adduction_2                         | 0.30 (0.11) | 0.31 (0.12)  | 0.34 (0.11) | 0.35 (0.13) | 0.778        | <b>0.025</b> | 0.936        |
| Hip adduction_1                          | 0.87 (0.22) | 0.77 (0.19)  | 0.83 (0.14) | 0.87 (0.22) | 0.470        | 0.369        | <b>0.047</b> |
| Hip adduction_2                          | 0.83 (0.20) | 0.71 (0.20)  | 0.82 (0.12) | 0.80 (0.23) | 0.156        | 0.201        | 0.088        |

Kinematic parameters (except FPA) and joint moments are the peak values during the stance phase of gait (standard deviation) averaged over the included trials. Negative values indicate extension, posterior tilt, external foot progression angle and ipsilateral thorax lean. Significant differences are bold printed.

Abbreviations: Int: interaction Group x Time; C1: cluster 1; C2: cluster 2; RoM: range of motion; FPA: foot progression angle; \_1: during the first half of stance; \_2: during the second half of stance.

**Table S2:** Preoperative and postoperative spatio-temporal, kinematic and kinetic outcome parameters and the p-values for the univariate analysis of variance (ANOVA) with normalized speed, age and BMI as covariates for comparison of the clusters to the healthy controls.

| Parameter                                |             |              |             |             |             | ANOVA        |              |              |              |              |              |              |              |              |              |
|------------------------------------------|-------------|--------------|-------------|-------------|-------------|--------------|--------------|--------------|--------------|--------------|--------------|--------------|--------------|--------------|--------------|
|                                          | Pre         |              | Post        |             | HC          | Pre          |              |              |              |              | Post         |              |              |              |              |
|                                          | C1          | C2           | C1          | C2          |             | Speed        | Age          | BMI          | C1,HC        | C2,HC        | Speed        | Age          | BMI          | C1,HC        | C2,HC        |
| <b>Spatiotemporal</b>                    |             |              |             |             |             |              |              |              |              |              |              |              |              |              |              |
| Walking speed (ms <sup>-1</sup> )        | 1.10 (0.15) | 1.03 (0.19)  | 1.21 (0.11) | 1.17 (0.17) | 1.30 (0.14) |              | 0.082        | <b>0.010</b> | <b>0.000</b> | <b>0.000</b> |              | <b>0.007</b> | 0.231        | <b>0.043</b> | <b>0.005</b> |
| Step length (cm)                         | 62.0 (4.3)  | 58.8 (8.5)   | 65.5 (5.2)  | 63.6 (7.4)  | 66.3 (5.6)  | <b>0.000</b> | <b>0.001</b> | 0.215        | 1.000        | 1.000        | <b>0.000</b> | <b>0.000</b> | 0.626        | 1.000        | 1.000        |
| Cadence (steps per min)                  | 108.1 (9.6) | 106.3 (11.0) | 111.6 (8.1) | 110.6 (9.0) | 116.7 (8.2) | <b>0.000</b> | <b>0.004</b> | 0.380        | 1.000        | 0.433        | <b>0.000</b> | <b>0.000</b> | 0.892        | 1.000        | 1.000        |
| Step width (cm)                          | 9.1 (2.6)   | 10.7 (3.1)   | 8.0 (2.6)   | 9.4 (2.9)   | 8.7 (2.4)   | 0.237        | 0.720        | <b>0.006</b> | 1.000        | 1.000        | 0.990        | 0.395        | <b>0.001</b> | 0.193        | 1.000        |
|                                          |             |              |             |             |             |              |              |              |              |              |              |              |              |              |              |
| <b>Kinematics (°)</b>                    |             |              |             |             |             |              |              |              |              |              |              |              |              |              |              |
| Hip extension                            | -9.7 (8.9)  | 8.7 (6.6)    | -14.5 (6.3) | -3.5 (7.9)  | -14.4 (6.8) | 0.072        | 0.399        | <b>0.013</b> | 1.000        | <b>0.000</b> | 0.335        | 0.231        | <b>0.038</b> | 1.000        | <b>0.001</b> |
| Hip flexion                              | 22.6 (5.0)  | 34.3 (4.6)   | 27.6 (7.2)  | 34.0 (4.9)  | 30.6 (6.4)  | <b>0.008</b> | 0.888        | <b>0.017</b> | <b>0.001</b> | <b>0.021</b> | <b>0.019</b> | 0.205        | <b>0.002</b> | 0.122        | 0.540        |
| Hip RoM                                  | 32.3 (8.6)  | 25.6 (5.7)   | 42.1 (4.8)  | 37.5 (5.4)  | 45.0 (4.9)  | <b>0.000</b> | 0.347        | 0.452        | <b>0.000</b> | <b>0.000</b> | <b>0.000</b> | 0.835        | 0.399        | 0.679        | <b>0.000</b> |
| Knee extension                           | 6.0 (6.0)   | 13.1 (5.7)   | 4.0 (5.1)   | 8.3 (5.2)   | 2.4 (3.7)   | 0.721        | 0.249        | 0.295        | 0.231        | <b>0.000</b> | 0.055        | 0.338        | 0.346        | 1.000        | <b>0.006</b> |
| Knee flexion                             | 15.2 (4.2)  | 18.5 (6.1)   | 18.5 (4.8)  | 19.9 (5.0)  | 20.7 (4.6)  | <b>0.000</b> | 0.351        | 0.359        | 0.104        | 1.000        | <b>0.028</b> | 0.230        | 0.246        | 0.385        | 1.000        |
| Knee RoM                                 | 9.2 (5.2)   | 5.4 (3.3)    | 14.6 (4.6)  | 11.6 (5.0)  | 18.3 (5.3)  | <b>0.000</b> | 0.725        | 0.809        | <b>0.000</b> | <b>0.000</b> | <b>0.000</b> | 0.784        | 0.802        | 0.197        | <b>0.002</b> |
| Pelvic tilt                              | 6.1 (5.4)   | 18.5 (4.3)   | 5.4 (5.5)   | 12.4 (5.1)  | 6.6 (5.4)   | 0.700        | 0.687        | <b>0.007</b> | 1.000        | <b>0.000</b> | 0.065        | 0.273        | <b>0.013</b> | 0.861        | <b>0.005</b> |
| Pelvic obliquity up                      | 1.8 (2.0)   | 2.5 (2.4)    | 3.2 (2.5)   | 3.1 (1.8)   | 4.0 (2.2)   | 0.061        | 0.337        | 0.540        | <b>0.042</b> | 0.956        | <b>0.005</b> | 0.369        | 0.261        | 1.000        | 1.000        |
| mean FPA                                 | -9.4 (7.3)  | -10.0 (7.1)  | -8.8 (5.1)  | -9.1 (6.0)  | -7.6 (4.5)  | 0.976        | <b>0.019</b> | 0.065        | 0.917        | 1.000        | 0.606        | <b>0.008</b> | 0.378        | 0.938        | 1.000        |
| Thorax tilt                              | 10.2 (5.8)  | 8.2 (5.0)    | 8.2 (4.6)   | 6.3 (4.8)   | 3.7 (4.3)   | 0.938        | 0.531        | 0.695        | <b>0.000</b> | <b>0.016</b> | 0.882        | 0.387        | 0.237        | <b>0.001</b> | <b>0.041</b> |
| Thorax lean                              | -3.0 (2.4)  | -3.7 (2.7)   | -3.1 (2.4)  | -2.9 (2.8)  | -1.5 (1.9)  | 0.165        | 0.693        | 0.786        | <b>0.015</b> | <b>0.001</b> | 0.538        | 0.924        | 0.820        | <b>0.031</b> | 0.078        |
|                                          |             |              |             |             |             |              |              |              |              |              |              |              |              |              |              |
| <b>Joint moments (Nmkg<sup>-1</sup>)</b> |             |              |             |             |             |              |              |              |              |              |              |              |              |              |              |
| Knee adduction_1                         | 0.37 (0.13) | 0.39 (0.15)  | 0.38 (0.11) | 0.44 (0.17) | 0.50 (0.15) | <b>0.039</b> | 0.265        | 0.503        | 0.067        | 0.349        | <b>0.000</b> | 0.792        | 0.860        | 0.091        | 1.000        |
| Knee adduction_2                         | 0.30 (0.11) | 0.31 (0.12)  | 0.34 (0.11) | 0.35 (0.13) | 0.43 (0.12) | 0.474        | 0.065        | 0.562        | <b>0.002</b> | <b>0.005</b> | 0.097        | 0.076        | 0.561        | <b>0.023</b> | 0.077        |
| Hip adduction_1                          | 0.87 (0.22) | 0.77 (0.19)  | 0.83 (0.14) | 0.87 (0.22) | 0.99 (0.16) | <b>0.007</b> | 0.066        | <b>0.004</b> | 0.731        | <b>0.004</b> | <b>0.000</b> | <b>0.001</b> | <b>0.006</b> | <b>0.047</b> | 0.201        |
| Hip adduction_2                          | 0.83 (0.20) | 0.71 (0.20)  | 0.82 (0.12) | 0.80 (0.23) | 0.90 (0.24) | 0.602        | 0.225        | <b>0.047</b> | 0.997        | <b>0.008</b> | 0.474        | 0.096        | <b>0.005</b> | 0.424        | 0.074        |

Kinematic parameters (except FPA) and joint moments are the peak values during the stance phase of gait (standard deviation) averaged over the included trials. Negative values indicate extension, posterior tilt, external foot progression angle and ipsilateral thorax lean. Significant differences are bold printed.

Abbreviations: C1: cluster 1; C2: cluster 2; HC: healthy controls; BMI: Body Mass Index; RoM: range of motion; FPA: foot progression angle; \_1: during the first half of stance; \_2: during the second half of stance.
